# Supplementary material for: Pre-diagnostic statin use, lymph node status and mortality in women with stages I–III breast cancer
Source: Springer Nature journal article supplement (doi:10.1038/bjc.2017.227), 2017-07-18
Supplement: 41416_2017_BFbjc2017227_MOESM427_ESM.docx [file 41416_2017_BFbjc2017227_MOESM427_ESM.docx]

000001111111110000001111

000000000…00000000000000000000000

00000000000000000001111

000000000…000111110000000011111000

00001111111111111111111

00011111…1111111111111111111111110

000000

111001

111111

**Exposure lag**

Excluded

i) Pre-diagnosis only user

ii) Low intensity, pre & post-diagnosis user

iii) High intensity, pre & post-diagnosis user

0000000000000000000000

00000000…000000000000000000000000

000000

**Pre-diagnosis**

**Post-diagnosis**

iv) Unexposed (reference)

Diagnosis of stage I-III breast cancer

Follow-up period

Death / end of follow-up

1 – Exposed to statin

0 – Unexposed

If exposed for >80% days in a 365 day period, then considered high intensity user

**Supplementary Figure 1. Diagrammatic representation of statin exposures included in this study.**

Example; i) pre-diagnostic (only) statin exposure, ii) pre and post-diagnosis statin exposure, of low intensity, iii) pre and post-diagnosis statin exposure, with high intensity, and iv) unexposed to statin, pre and post-diagnosis (reference group)
